# Supplementary material for: Ranked Adjusted Rand: integrating distance and partition information in a measure of clustering agreement
Source: PubMed Central journal article supplement (PMC1802093; doi:10.1186/1471-2105-8-44), 2007-02-07
Supplement: 1471-2105-8-44-S1.pdf [file 1471-2105-8-44-S1.pdf]

**Supplement 1 - Equivalence of RAR and HA when distance information is not available for any of the two clusterings being compared**

Both RMM and MM count entity pairs, but RMM counts the pairs  $(i,j)$  and  $(j,i)$  while MM counts only unique pairs. Consequently, the sum of all MM elements is  $a+b+c+d=(n^2-n)/2$ , while the sum of all RMM elements is  $(n^2-n)$ . Independently of the availability of distance information,  $rmm_{1,1}$  counts the number of entity pairs that are in the same cluster in both clusterings. This is also the kind of entity pairs that are counted in the element  $a$  of MM. As in RMM the order of the entities in the pair is accounted,  $rmm_{1,1}$  is identical to  $2a$ . In the absence of distance information, the maximum intercluster distance rank is 1 and RMM is a 2 by 2 matrix.  $rmm_{1,2}$  counts the pairs of entities that are in the same cluster in C and in different clusters in C' that have an intercluster distance rank of 1. It counts all the pairs that are in the same cluster in C and in different clusters in C', which is equivalent to  $2b$ . Analogously,  $rmm_{2,1}$  is equal to the  $2c$ . Finally,  $rmm_{2,2}$  counts the entity pairs that are in different clusters in both clusterings, which is identical to  $2d$ . Applying these four equivalences in expression (5) of the main text:

$$MDD_{nd} = \frac{2a \left| \frac{0}{1} - \frac{0}{1} \right| + 2b \left| \frac{0}{1} - \frac{1}{1} \right| + 2c \left| \frac{1}{1} - \frac{0}{1} \right| + 2d \left| \frac{1}{1} - \frac{1}{1} \right|}{n^2 - n}$$

$$MDD_{nd} = \frac{b+c}{(n^2-n)/2} = \frac{b+c}{a+b+c+d} = 1 - \frac{a+d}{a+b+c+d}$$

$$MDD_{nd} = 1 - RI$$

Where RI is the Rand index and the index nd refers to the absence of intercluster distance information. Analogously:

$$MDD_{nd}^{ind} = \frac{rmm_{1,2}^{ind,nd} + rmm_{2,1}^{ind,nd}}{n^2 - n} = 1 - \frac{rmm_{1,1}^{ind,nd} + rmm_{2,2}^{ind,nd}}{n^2 - n}$$

The (1,1) and (2,2) elements of RMM in the absence of can be determined through expression (6) of the main text:

$$\begin{aligned} rmm_{1,1}^{ind,nd} &= \left( \sum_{i=1}^K (n_i^2 - n_i) \right) \times \left( \sum_{i=1}^{K'} (n_i'^2 - n_i') \right) / (n^2 - n) = \\ &= \left( \sum_{i=1}^K (n_i^2) - n \right) \times \left( \sum_{i=1}^{K'} (n_i'^2) - n \right) / (n^2 - n) = \end{aligned}$$

$$\begin{aligned}
&= \left( \sum_{i=1}^K (n_i^2) \sum_{i=1}^{K'} (n_i'^2) - n \left( \sum_{i=1}^K (n_i^2) + \sum_{i=1}^{K'} (n_i'^2) \right) + n^2 \right) / (n^2 - n) = \\
&= \left( \sum_{i=1}^K \sum_{j=1}^{K'} (n_i^2 n_j'^2) - n \left( \sum_{i=1}^K (n_i^2) + \sum_{i=1}^{K'} (n_i'^2) \right) + n^2 \right) / (n(n-1)) = \\
&= \left( \sum_{i=1}^K \sum_{j=1}^{K'} \left( \frac{n_i^2 n_j'^2}{n} \right) - \left( \sum_{i=1}^K (n_i^2) + \sum_{i=1}^{K'} (n_i'^2) \right) + n \right) / (n-1) \\
rmm_{2,2}^{ind,nd} &= 2 \left( \sum_{i=1}^K \sum_{j=i+1}^K n_i \cdot n_j \right) \times 2 \left( \sum_{i=1}^{K'} \sum_{j=i+1}^{K'} n_i' \cdot n_j' \right) / (n^2 - n) = \\
&= \left( \sum_{i=1}^K \sum_{j=1}^K n_i \cdot n_j - \sum_{i=1}^K n_i^2 \right) \times \left( \sum_{i=1}^{K'} \sum_{j=1}^{K'} n_i' \cdot n_j' - \sum_{i=1}^{K'} n_i'^2 \right) / (n^2 - n) = \\
&= \left( \sum_{i=1}^K \left( n_i \cdot \sum_{j=1}^K n_j \right) - \sum_{i=1}^K n_i^2 \right) \times \left( \sum_{i=1}^{K'} \left( n_i' \cdot \sum_{j=1}^{K'} n_j' \right) - \sum_{i=1}^{K'} n_i'^2 \right) / (n^2 - n) = \\
&= \left( \sum_{i=1}^K (n_i \cdot n) - \sum_{i=1}^K n_i^2 \right) \times \left( \sum_{i=1}^{K'} (n_i' \cdot n) - \sum_{i=1}^{K'} n_i'^2 \right) / (n^2 - n) = \\
&= \left( n \sum_{i=1}^K (n_i) - \sum_{i=1}^K n_i^2 \right) \times \left( n \sum_{i=1}^{K'} (n_i') - \sum_{i=1}^{K'} n_i'^2 \right) / (n^2 - n) = \\
&= \left( n^2 - \sum_{i=1}^K n_i^2 \right) \times \left( n^2 - \sum_{i=1}^{K'} n_i'^2 \right) / (n^2 - n) = \\
&= \left( n^4 - n^2 \sum_{i=1}^K n_i^2 - n^2 \sum_{i=1}^{K'} n_i'^2 + \sum_{i=1}^K \sum_{j=1}^{K'} n_i^2 n_j'^2 \right) / (n(n-1)) = \\
&= \left( n^3 - n \sum_{i=1}^K n_i^2 - n \sum_{i=1}^{K'} n_i'^2 + \sum_{i=1}^K \sum_{j=1}^{K'} \frac{n_i^2 n_j'^2}{n} \right) / (n-1)
\end{aligned}$$

The expected MDD for independent clusterings in the absence of intercluster distance information is then:

$$MDD_{nd}^{ind} = 1 - \frac{n + n^3 - (n+1) \sum_{i=1}^K n_i^2 - (n+1) \sum_{i=1}^{K'} n_i'^2 + 2 \sum_{i=1}^K \sum_{j=1}^{K'} \frac{n_i^2 n_j'^2}{n}}{n(n-1)^2}$$

$$MDD_{nd}^{ind} = 1 - \frac{n(n^2 + 1) - (n+1) \sum_{i=1}^K n_i^2 - (n+1) \sum_{i=1}^{K'} n_i'^2 + 2 \sum_{i=1}^K \sum_{j=1}^{K'} \frac{n_i^2 n_j'^2}{n}}{2(n-1) / n(n-1)}$$

$$MDD_{nd}^{ind} = 1 - \frac{n_c}{n(n-1)/2} = 1 - \frac{n_c}{a+b+c+d}$$

Knowing  $MDD_{nd}$  and  $MDD_{nd}^{ind}$ ,  $RAR_{nd}$  can be deduced. By simplifying the expression of  $RAR_{nd}$ , it is possible to show that  $RAR$  in the absence of distance information is equivalent to the adjusted Rand index  $HA$  (expression (1) in the main text):

$$RAR_{nd} = \frac{MDD_{nd}^{ind} - MDD_{nd}}{MDD_{nd}^{ind}} =$$

$$RAR_{nd} = \frac{1 - \frac{n_c}{a+b+c+d} - \left(1 - \frac{a+d}{a+b+c+d}\right)}{1 - \frac{n_c}{a+b+c+d}} =$$

$$RAR_{nd} = \frac{-\frac{n_c}{a+b+c+d} + \frac{a+d}{a+b+c+d}}{\frac{a+b+c+d-n_c}{a+b+c+d}} =$$

$$RAR_{nd} = \frac{\frac{a+d-n_c}{a+b+c+d}}{\frac{a+b+c+d-n_c}{a+b+c+d}} = \frac{a+d-n_c}{a+b+c+d-n_c} = HA$$
